# Supplementary material
Source: Springer Nature journal article supplement (https://publikationen.ub.uni-frankfurt.de/opus4/files/23509/12934_2012_667_MOESM9_ESM.PDF)

# MAPK SIGNALING PATHWAY

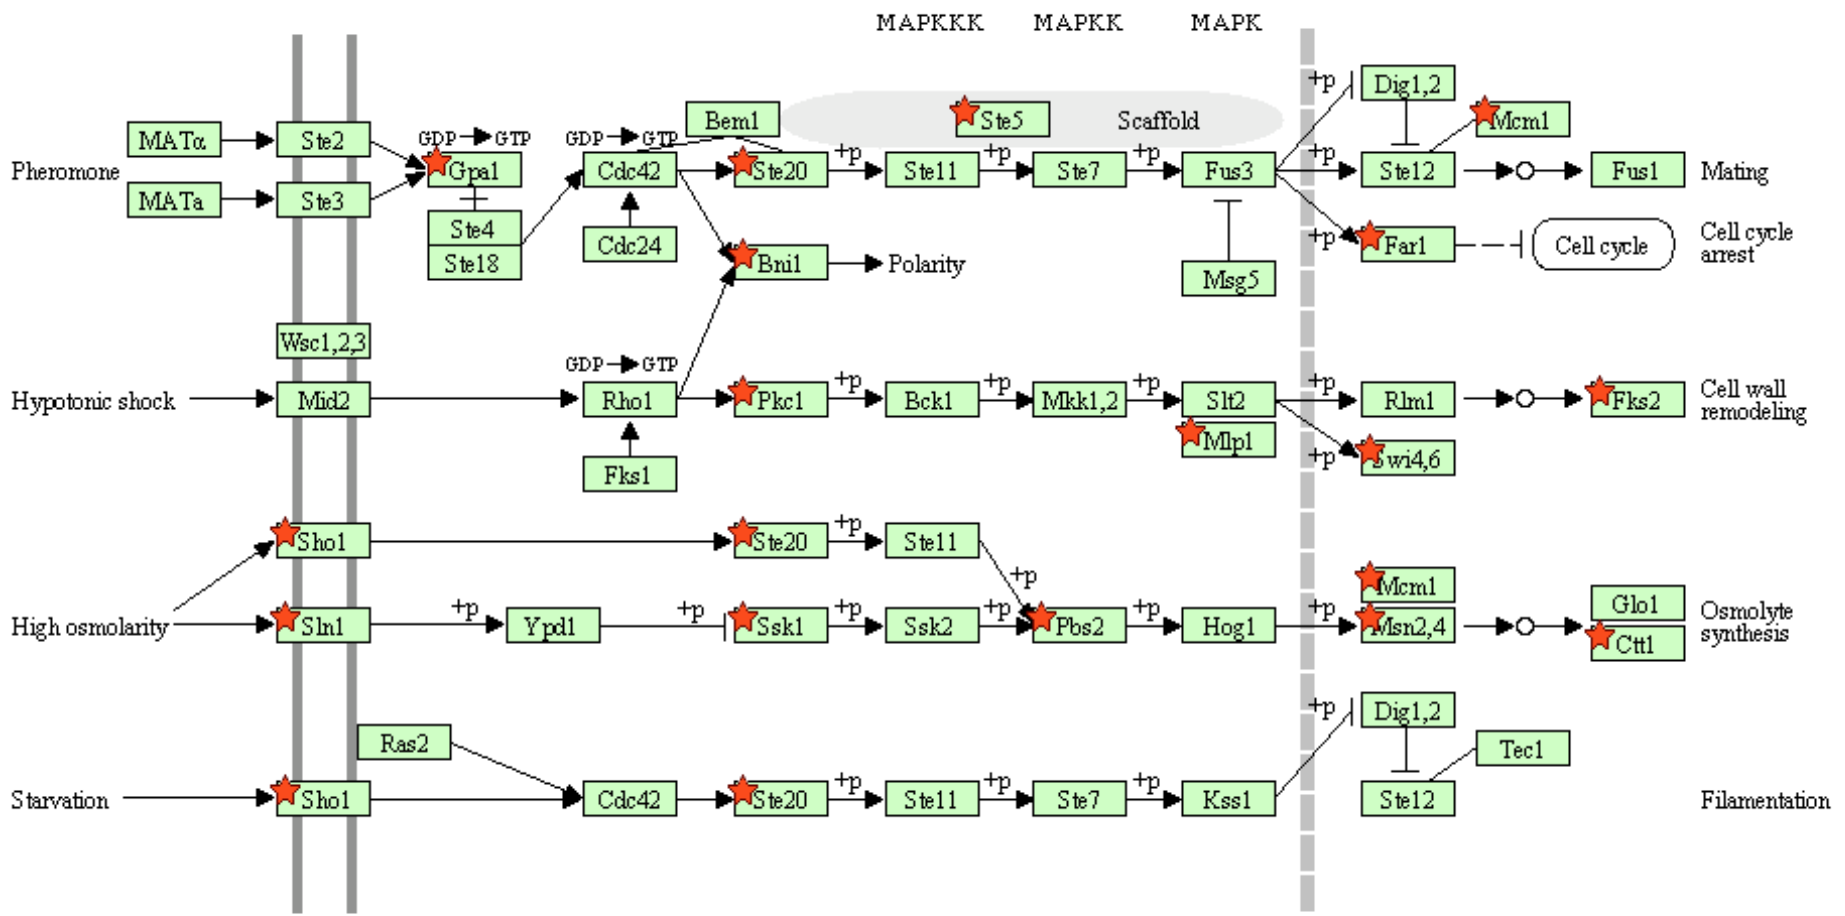

Supplement: MOESM9 [file 12934_2012_667_MOESM9_ESM.PDF]
